# Supplementary material
Source: MDPI journal article supplement (https://www.mdpi.com/2071-1050/8/5/414)
Supplement: s1 [file s1]

## Sheet: Database, Table 3
Year/ Mt	N fertilzier	P fertilzier	K fertilzier	Compound fertilizer	Agricultural output value 10^8 CNY	Agricultural output value index(last year=100)(%)
1991	17.261	4.996	1.739	4.055	8157.03	103.7
1992	17.561	5.157	1.96	4.624	8679.08	106.4
1993	18.351	5.751	2.123	5.294	9356.05	107.8
1994	18.82	6.007	2.348	6.006	10160.7	108.6
1995	20.219	6.324	2.685	6.708	11268.2	110.9
1996	21.4532	6.584	2.8955	7.3468	12327.4	109.4
1997	21.7167	6.8911	3.2196	7.9806	13153.3	106.7
1998	22.3437	6.8276	3.4626	8.2219	13942.5	106
1999	21.8094	6.9778	3.6564	8.8003	14597.8	104.7
2000	21.6156	6.9047	3.765	9.1787	15123.3	103.6
2001	21.6411	7.0573	3.9957	9.8369	15758.5	104.2
2002	21.5731	7.1223	4.2237	10.4035	16530.7	104.9
2003	21.4989	7.1386	4.3801	11.0983	17191.9	104
2004	22.2189	7.3596	4.6729	12.04	18481.3	107.5
2005	22.2929	7.4384	4.8945	13.0318	19534.8	105.7
2006	22.625	7.6951	5.0975	13.8585	20589.6	105.4
2007	22.9721	7.7302	5.3362	15.0298	21392.6	103.9
2008	23.0288	7.8008	5.452	16.086	22612	105.7
2009	23.2988	7.9773	5.6429	16.9869	23652.2	104.6
2010	23.5368	8.0564	5.8644	17.985	24692.8	104.4
2011	23.8142	8.1919	6.0513	18.9509	25804	104.5
2012	23.9989	8.2857	6.1771	19.8997	27068.4	104.9
2013	23.9424	8.3061	6.2742	20.5748	28151.2	104
2014	23.9286	8.4534	6.4194	21.1581	29333.5	104.2
	tC/t	tC/t	tC/t	tC/t	tC/t	kg N2O-N/ kg	tC/t	tC/t	tC/t	tC/t	tC/t
Emmision factor	1.74	0.2	0.15	6	2.58	0.0092	0.518263	0.201879	0.780114	0.797743	0.84
Year/Mt	N fertilzier	P fertilzier	K fertilzier	Pesticides	Plastic film	N fertilizer induced N2O	Raw Coal	Other Washed Coal	Coke	Gasoline	Diesel	Electricity 10^10kwh	C t/MWH(kg/kwh)
1991	18.6127	6.34767	3.09067	0.7653	0.642145		21.05	0.195	0.34	1.683	8.934	4.798	0.229091
1992	19.1023	6.69833	3.50133	0.7992	0.780611		17.46	0.217	0.523	1.788	8.855	5.224	0.229091
1993	20.1157	7.51567	3.88767	0.8448	0.707321		15.8225	0.1791	1.339	1.3948	9.1925	4.8099	0.226364
1994	20.822	8.009	4.35	0.9786	0.887064		17.5419	0.2568	1.1118	1.5134	9.3425	5.3058	0.226364
1995	22.455	8.56	4.921	1.087	0.915487		18.2436	0.2725	1.2862	1.7966	10.0139	5.8224	0.229091
1996	23.9021	9.03293	5.34443	1.1408	1.05615		18.4843	0.4839	1.1984	1.802	10.2836	6.1829	0.24
1997	24.3769	9.5513	5.8798	1.1955	1.16153		12.1559	0.2718	0.7126	0.7345	5.3298	4.5977	0.24
1998	25.0843	9.56823	6.20323	1.2317	1.20687		11.6559	0.1984	0.7597	0.8079	5.6413	4.7349	0.237273
1999	24.7428	9.91123	6.58983	1.3216	1.25867		9.5578	0.1883	0.7207	0.847	6.2929	5.1035	0.237273
2000	24.6752	9.96427	6.82457	1.2795	1.33545		16.2239	0.2529	1.4418	1.8451	13.1014	6.7296	0.229091
2001	24.9201	10.3363	7.27467	1.2748	1.44929		15.74	0.2564	1.3923	1.906	13.7564	7.6239	0.220909
2002	25.0409	10.5901	7.69153	1.3113	1.53076		16	0.2289	1.4098	1.8793	14.8431	7.7623	0.218182
2003	25.1983	10.838	8.07953	1.3252	1.59167		16.6	0.2333	1.4098	1.95	14.844	7.7315	0.218182
2004	26.2322	11.3729	8.68623	1.386	1.67999		22.2639	0.248	0.9869	2.2013	17.743	8.0887	0.207273
2005	26.6368	11.7823	9.23843	1.4599	1.76233		22.8984	0.254	0.6347	2.2799	18.3764	8.7633	0.207273
2006	27.2445	12.3146	9.717	1.5371	1.84548		22.8297	0.2667	0.7961	2.3964	19.6504	9.4704	0.21
2007	27.982	12.7401	10.3461	1.6228	1.93747		23.058	0.32	0.8176	2.4683	18.7534	9.7896	0.207273
2008	28.3908	13.1628	10.814	1.6723	2.00692		14.9377	0.288	0.5314	1.6044	10.9887	8.8705	0.193636
2009	28.9611	13.6396	11.3052	1.709	2.0797		15.4755	0.3456	0.4459	1.6806	11.3415	9.399	0.190909
2010	29.5318	14.0514	11.8594	1.7582	2.17299		16.7135	0.3975	0.4682	1.6907	12.0673	9.7649	0.177273
2011	30.1312	14.5089	12.3683	1.787	2.29454		17.2483	0.318	0.5405	1.8598	12.719	10.129	0.18
2012	30.6321	14.9189	12.8103	1.80606	2.383		17.3001	0.3611	0.5748	1.9286	13.3549	10.1257	0.18
2013	30.8007	15.1644	13.1325	1.8019	2.49318		24.0543	0.4514	0.6917	1.9872	14.4153	10.2687	0.18	estimated
2014	30.9813	15.5061	13.4721	1.80692	2.58		25.3408	0.4469	0.3485	2.166	14.9198	10.1339	0.18	estimated
Year/Mt CE	N fertilzier	P fertilzier	K fertilzier	Pesticides	Plastic film	N fertilizer induced N2O	Raw Coal	Other Washed Coal	Coke	Gasoline	Diesel	Electricity	Total CF	Agricultural output value 10^8CNY	CIP(kg CE/CNY)		Agrochemicals	Agricultural Energy	N+N2O
1991	32.386	1.26953	0.4636	4.5918	1.65673	21.8694	10.9094	0.0393663	0.265239	1.3426	7.50456	10.9918	93.29	8157.03	0.114368		62.2371	31.053	54.2554
1992	33.2381	1.33967	0.5252	4.7952	2.01398	22.4447	9.04888	0.0438077	0.408	1.42636	7.4382	11.9677	94.6898	8679.08	0.109101		64.3568	30.333	55.6828
1993	35.0013	1.50313	0.58315	5.0688	1.82489	23.6353	8.20022	0.0361565	1.04457	1.11269	7.7217	10.8879	96.6198	9356.05	0.10327		67.6166	29.0032	58.6366
1994	36.2303	1.6018	0.6525	5.8716	2.28863	24.4653	9.09132	0.0518424	0.867331	1.2073	7.8477	12.0104	102.186	10160.7	0.10057		71.1101	31.0759	60.6955
1995	39.0717	1.712	0.73815	6.522	2.36196	26.384	9.45499	0.0550119	1.00338	1.43322	8.41168	13.3386	110.487	11268.2	0.0980519		76.7898	33.6969	65.4557
1996	41.5897	1.80659	0.801665	6.8448	2.72487	28.0843	9.57973	0.0976891	0.934889	1.43753	8.63822	14.839	117.379	12327.4	0.095218		81.852	35.527	69.674
1997	42.4158	1.91026	0.88197	7.173	2.99675	28.6422	6.29996	0.0548706	0.555909	0.585942	4.47703	11.0345	107.028	13153.3	0.0813696		84.0199	23.0082	71.058
1998	43.6467	1.91365	0.930485	7.3902	3.11372	29.4734	6.04083	0.0400527	0.592653	0.644496	4.73869	11.2346	109.76	13942.5	0.0787228		86.4682	23.2913	73.1201
1999	43.0525	1.98225	0.988475	7.9296	3.24738	29.0721	4.95346	0.0380137	0.562228	0.675688	5.28604	12.1092	109.897	14597.8	0.0752831		86.2724	23.6246	72.1247
2000	42.9348	1.99285	1.02368	7.677	3.44545	28.9926	8.40825	0.0510551	1.12477	1.47191	11.0052	15.4169	123.544	15123.3	0.0816912		86.0664	37.4781	71.9274
2001	43.3609	2.06725	1.0912	7.6488	3.73916	29.2804	8.15746	0.0517617	1.08615	1.5205	11.5554	16.8419	126.401	15758.5	0.0802111		87.1877	39.2131	72.6413
2002	43.5712	2.11803	1.15373	7.8678	3.94935	29.4224	8.29221	0.04621	1.09981	1.4992	12.4682	16.9359	128.424	16530.7	0.0776883		88.0825	40.3416	72.9936
2003	43.8451	2.16761	1.21193	7.9512	4.10651	29.6073	8.60317	0.0470983	1.09981	1.5556	12.469	16.8687	129.533	17191.9	0.0753453		88.8897	40.6434	73.4524
2004	45.6441	2.27459	1.30293	8.316	4.33436	30.8221	11.5386	0.0500659	0.769895	1.75607	14.9041	16.7657	138.478	18481.3	0.0749289		92.6941	45.7844	76.4662
2005	46.3481	2.35647	1.38576	8.7594	4.5468	31.2975	11.8674	0.0512772	0.495138	1.81877	15.4362	18.1639	142.527	19534.8	0.0729606		94.694	47.8327	77.6456
2006	47.4054	2.46292	1.45755	9.2226	4.76134	32.0115	11.8318	0.053841	0.621049	1.91171	16.5063	19.8878	148.134	20589.6	0.0719459		97.3214	50.8126	79.4169
2007	48.6887	2.54803	1.55192	9.7368	4.99867	32.8781	11.9501	0.0646012	0.637821	1.96907	15.7529	20.2912	151.068	21392.6	0.0706168		100.402	50.6656	81.5668
2008	49.4	2.63256	1.6221	10.0338	5.17786	33.3584	7.74166	0.058141	0.414553	1.2799	9.23051	17.1765	138.126	22612	0.0610852		102.225	35.9013	82.7584
2009	50.3923	2.72792	1.69578	10.254	5.36562	34.0285	8.02038	0.0697693	0.347853	1.34069	9.52686	17.9435	141.713	23652.2	0.0599156		104.464	37.2491	84.4208
2010	51.3853	2.81028	1.77891	10.5492	5.60632	34.699	8.66199	0.0802468	0.365249	1.34874	10.1365	17.3105	144.732	24692.8	0.0586131		106.829	37.9033	86.0844
2011	52.4282	2.90177	1.85524	10.722	5.9199	35.4033	8.93916	0.0641974	0.421652	1.48364	10.684	18.2322	149.055	25804	0.0577643		109.23	39.8248	87.8315
2012	53.2999	2.98379	1.92155	10.8363	6.14815	35.9919	8.96599	0.0728984	0.44841	1.53853	11.2181	18.2263	151.652	27068.4	0.0560254		111.182	40.4702	89.2918
2013	53.5932	3.03287	1.96987	10.8114	6.43241	36.1899	12.4665	0.091128	0.539605	1.58527	12.1089	18.4837	157.305	28151.2	0.0558785		112.03	45.275	89.7831
2014	53.9075	3.10122	2.02082	10.8415	6.6564	36.4021	13.1332	0.0902196	0.27187	1.72791	12.5326	18.241	158.926	29333.5	0.0541791		112.93	45.9969	90.3096
Average													127.956	17815	0.0777002		90.6229	37.3335	74.8872
Year/CE%	N fertilzier	P fertilzier	K fertilzier	Pesticides	Plastic film	N fertilizer induced N2O	Raw Coal	Other Washed Coal	Coke	Gasoline	Diesel	Electricity	Total	N+N2O	Agrochemicals	Energy	Total CF Mt	Agricultural output value 10^8CNY	CIP(kg CE/CNY)		Agricultural output value TCNY
1991	34.7154	1.36085	0.496945	4.92207	1.7759	23.4423	11.6941	0.0421978	0.284316	1.43917	8.04433	11.7824	100	58.1577	66.7135	33.2865	93.29	8157.03	0.114368		0.815703
1992	35.1021	1.4148	0.554653	5.06412	2.12692	23.7034	9.55634	0.0462644	0.430881	1.50635	7.85534	12.6389	100	58.8055	67.966	32.034	94.6898	8679.08	0.109101		0.867908
1993	36.2258	1.55572	0.603551	5.24613	1.88873	24.4622	8.4871	0.0374214	1.08112	1.15162	7.99184	11.2688	100	60.688	69.9821	30.0179	96.6198	9356.05	0.10327		0.935605
1994	35.4552	1.56753	0.638542	5.74599	2.23967	23.9419	8.89684	0.0507334	0.848777	1.18148	7.67982	11.7535	100	59.3971	69.5889	30.4111	102.186	10160.7	0.10057		1.01607
1995	35.3633	1.54951	0.66809	5.90297	2.13778	23.8798	8.55758	0.0497906	0.908148	1.29719	7.6133	12.0726	100	59.2431	69.5014	30.4986	110.487	11268.2	0.0980519		1.12682
1996	35.432	1.53911	0.682971	5.83137	2.32143	23.9262	8.16137	0.0832254	0.79647	1.22469	7.35926	12.6419	100	59.3582	69.7331	30.2669	117.379	12327.4	0.095218		1.23274
1997	39.6305	1.78482	0.824054	6.70198	2.79997	26.7613	5.88626	0.0512675	0.519405	0.547465	4.18304	10.3099	100	66.3919	78.5027	21.4973	107.028	13153.3	0.0813696		1.31533
1998	39.7658	1.74349	0.847749	6.73308	2.83685	26.8527	5.50369	0.0364913	0.539956	0.587189	4.31734	10.2357	100	66.6185	78.7797	21.2203	109.76	13942.5	0.0787228		1.39425
1999	39.1753	1.80373	0.899456	7.21548	2.95493	26.454	4.50736	0.0345903	0.511596	0.614838	4.80999	11.0187	100	65.6293	78.5029	21.4971	109.897	14597.8	0.0752831		1.45978
Average	36.7628	1.59106	0.690668	5.92924	2.34246	24.8249	7.91674	0.047998	0.657852	1.06111	6.65047	11.5247	100	61.5877	72.1411	27.8589	104.593	11293.6	0.095106		1.12936
2000	34.7525	1.61307	0.828596	6.21396	2.78884	23.4674	6.80585	0.0413253	0.910416	1.1914	8.90787	12.4788	100	58.2199	69.6643	30.3357	123.544	15123.3	0.0816912		1.51233
2001	34.3043	1.63547	0.863285	6.05123	2.95817	23.1647	6.45365	0.0409504	0.859293	1.20292	9.14185	13.3242	100	57.469	68.9772	31.0228	126.401	15758.5	0.0802111		1.57585
2002	33.9276	1.64924	0.898375	6.12642	3.07524	22.9103	6.4569	0.0359824	0.856385	1.16738	9.70862	13.1875	100	56.8379	68.5872	31.4128	128.424	16530.7	0.0776883		1.65307
2003	33.8486	1.6734	0.935615	6.13836	3.17024	22.857	6.64168	0.0363601	0.849054	1.20093	9.62609	13.0227	100	56.7056	68.6232	31.3768	129.533	17191.9	0.0753453		1.71919
2004	32.9611	1.64256	0.940894	6.00527	3.12999	22.2577	8.33239	0.0361543	0.555967	1.26812	10.7628	12.1071	100	55.2188	66.9375	33.0625	138.478	18481.3	0.0749289		1.84813
2005	32.5189	1.65335	0.972284	6.14579	3.19014	21.9591	8.32644	0.0359772	0.3474	1.27609	10.8304	12.7442	100	54.4779	66.4395	33.5605	142.527	19534.8	0.0729606		1.95348
2006	32.0017	1.66263	0.983941	6.22585	3.21421	21.6098	7.98724	0.0363462	0.419248	1.29053	11.1428	13.4256	100	53.6116	65.6982	34.3018	148.134	20589.6	0.0719459		2.05896
2007	32.2297	1.68668	1.0273	6.44531	3.30889	21.7638	7.91043	0.042763	0.422208	1.30343	10.4277	13.4318	100	53.9935	66.4617	33.5383	151.068	21392.6	0.0706168		2.13926
Average	33.3181	1.65205	0.931286	6.16902	3.10447	22.4987	7.36432	0.0382324	0.652497	1.2376	10.0685	12.9652	100	55.8168	67.6736	32.3264	136.014	18075.3	0.0756735		1.80753
2008	35.7644	1.90591	1.17436	7.26424	3.74865	24.1507	5.60478	0.0420928	0.300127	0.926617	6.68267	12.4354	100	59.9151	74.0083	25.9917	138.126	22612	0.0610852		2.2612
2009	35.5594	1.92496	1.19663	7.23574	3.78625	24.0122	5.65959	0.0492327	0.245463	0.946056	6.72263	12.6619	100	59.5716	73.7152	26.2848	141.713	23652.2	0.0599156		2.36522
2010	35.5037	1.94171	1.2291	7.28877	3.87358	23.9746	5.98484	0.0554449	0.252362	0.931888	7.00364	11.9604	100	59.4783	73.8115	26.1885	144.732	24692.8	0.0586131		2.46928
2011	35.1737	1.94678	1.24467	7.19331	3.97162	23.7518	5.99721	0.0430695	0.282883	0.995364	7.16779	12.2318	100	58.9255	73.2818	26.7182	149.055	25804	0.0577643		2.5804
2012	35.1462	1.96752	1.26708	7.14554	4.05412	23.7332	5.91222	0.0480696	0.295684	1.01451	7.39728	12.0185	100	58.8795	73.3137	26.6863	151.652	27068.4	0.0560254		2.70684
2013	34.0697	1.92803	1.25226	6.87291	4.08914	23.0063	7.92505	0.0579309	0.343032	1.00777	7.69771	11.7502	100	57.0759	71.2183	28.7817	157.305	28151.2	0.0558785		2.81512
2014	33.9198	1.95136	1.27154	6.82172	4.18835	22.905	8.2637	0.0567681	0.171066	1.08724	7.88581	11.4777	100	56.8248	71.0578	28.9422	158.926	29333.5	0.0541791		2.93335
Average	35.0196	1.93804	1.23366	7.11746	3.95882	23.6477	6.4782	0.0503727	0.270088	0.987064	7.22251	12.0765	100	58.6672	72.9152	27.0848	148.787	25902	0.0576373		2.5902
Year/Mt CE	N fertilzier	N fertilizer induced N2O	P fertilzier	K fertilzier	Pesticides	Plastic film	Raw Coal	Other Washed Coal	Coke	Gasoline	Diesel	Electricity	Total CF	Annual growth rate %
1991	32.386	21.8694	1.26953	0.4636	4.5918	1.65673	10.9094	0.0393663	0.265239	1.3426	7.50456	10.9918	93.29
1992	33.2381	22.4447	1.33967	0.5252	4.7952	2.01398	9.04888	0.0438077	0.408	1.42636	7.4382	11.9677	94.6898
1993	35.0013	23.6353	1.50313	0.58315	5.0688	1.82489	8.20022	0.0361565	1.04457	1.11269	7.7217	10.8879	96.6198
1994	36.2303	24.4653	1.6018	0.6525	5.8716	2.28863	9.09132	0.0518424	0.867331	1.2073	7.8477	12.0104	102.186
1995	39.0717	26.384	1.712	0.73815	6.522	2.36196	9.45499	0.0550119	1.00338	1.43322	8.41168	13.3386	110.487
1996	41.5897	28.0843	1.80659	0.801665	6.8448	2.72487	9.57973	0.0976891	0.934889	1.43753	8.63822	14.839	117.379
1997	42.4158	28.6422	1.91026	0.88197	7.173	2.99675	6.29996	0.0548706	0.555909	0.585942	4.47703	11.0345	107.028
1998	43.6467	29.4734	1.91365	0.930485	7.3902	3.11372	6.04083	0.0400527	0.592653	0.644496	4.73869	11.2346	109.76
1999	43.0525	29.0721	1.98225	0.988475	7.9296	3.24738	4.95346	0.0380137	0.562228	0.675688	5.28604	12.1092	109.897	1.97793	1991-1999
2000	42.9348	28.9926	1.99285	1.02368	7.677	3.44545	8.40825	0.0510551	1.12477	1.47191	11.0052	15.4169	123.544
2001	43.3609	29.2804	2.06725	1.0912	7.6488	3.73916	8.15746	0.0517617	1.08615	1.5205	11.5554	16.8419	126.401
2002	43.5712	29.4224	2.11803	1.15373	7.8678	3.94935	8.29221	0.04621	1.09981	1.4992	12.4682	16.9359	128.424
2003	43.8451	29.6073	2.16761	1.21193	7.9512	4.10651	8.60317	0.0470983	1.09981	1.5556	12.469	16.8687	129.533
2004	45.6441	30.8221	2.27459	1.30293	8.316	4.33436	11.5386	0.0500659	0.769895	1.75607	14.9041	16.7657	138.478
2005	46.3481	31.2975	2.35647	1.38576	8.7594	4.5468	11.8674	0.0512772	0.495138	1.81877	15.4362	18.1639	142.527
2006	47.4054	32.0115	2.46292	1.45755	9.2226	4.76134	11.8318	0.053841	0.621049	1.91171	16.5063	19.8878	148.134
2007	48.6887	32.8781	2.54803	1.55192	9.7368	4.99867	11.9501	0.0646012	0.637821	1.96907	15.7529	20.2912	151.068	2.78477	2000-2007
2008	49.4	33.3584	2.63256	1.6221	10.0338	5.17786	7.74166	0.058141	0.414553	1.2799	9.23051	17.1765	138.126
2009	50.3923	34.0285	2.72792	1.69578	10.254	5.36562	8.02038	0.0697693	0.347853	1.34069	9.52686	17.9435	141.713
2010	51.3853	34.699	2.81028	1.77891	10.5492	5.60632	8.66199	0.0802468	0.365249	1.34874	10.1365	17.3105	144.732
2011	52.4282	35.4033	2.90177	1.85524	10.722	5.9199	8.93916	0.0641974	0.421652	1.48364	10.684	18.2322	149.055
2012	53.2999	35.9919	2.98379	1.92155	10.8363	6.14815	8.96599	0.0728984	0.44841	1.53853	11.2181	18.2263	151.652
2013	53.5932	36.1899	3.03287	1.96987	10.8114	6.43241	12.4665	0.091128	0.539605	1.58527	12.1089	18.4837	157.305
2014	53.9075	36.4021	3.10122	2.02082	10.8415	6.6564	13.1332	0.0902196	0.27187	1.72791	12.5326	18.241	158.926	2.15129	2008-2014
														2.93155	1991-2014
Year/CE%	N fertilzier	N fertilizer induced N2O	P fertilzier	K fertilzier	Pesticides	Plastic film	Raw Coal	Other Washed Coal	Coke	Gasoline	Diesel	Electricity
1991	34.7154	23.4423	1.36085	0.496945	4.92207	1.7759	11.6941	0.0421978	0.284316	1.43917	8.04433	11.7824
1992	35.1021	23.7034	1.4148	0.554653	5.06412	2.12692	9.55634	0.0462644	0.430881	1.50635	7.85534	12.6389
1993	36.2258	24.4622	1.55572	0.603551	5.24613	1.88873	8.4871	0.0374214	1.08112	1.15162	7.99184	11.2688
1994	35.4552	23.9419	1.56753	0.638542	5.74599	2.23967	8.89684	0.0507334	0.848777	1.18148	7.67982	11.7535
1995	35.3633	23.8798	1.54951	0.66809	5.90297	2.13778	8.55758	0.0497906	0.908148	1.29719	7.6133	12.0726
1996	35.432	23.9262	1.53911	0.682971	5.83137	2.32143	8.16137	0.0832254	0.79647	1.22469	7.35926	12.6419
1997	39.6305	26.7613	1.78482	0.824054	6.70198	2.79997	5.88626	0.0512675	0.519405	0.547465	4.18304	10.3099
1998	39.7658	26.8527	1.74349	0.847749	6.73308	2.83685	5.50369	0.0364913	0.539956	0.587189	4.31734	10.2357
1999	39.1753	26.454	1.80373	0.899456	7.21548	2.95493	4.50736	0.0345903	0.511596	0.614838	4.80999	11.0187
%	1.42745	1.42745	3.6161	8.99969	5.17717	7.37677	-6.82846	-2.00312	8.8821	-6.36425	-4.46738	-0.720171
Average	36.7628	24.8249	1.59106	0.690668	5.92924	2.34246	7.91674	0.047998	0.657852	1.06111	6.65047	11.5247
2000	34.7525	23.4674	1.61307	0.828596	6.21396	2.78884	6.80585	0.0413253	0.910416	1.1914	8.90787	12.4788
2001	34.3043	23.1647	1.63547	0.863285	6.05123	2.95817	6.45365	0.0409504	0.859293	1.20292	9.14185	13.3242
2002	33.9276	22.9103	1.64924	0.898375	6.12642	3.07524	6.4569	0.0359824	0.856385	1.16738	9.70862	13.1875
2003	33.8486	22.857	1.6734	0.935615	6.13836	3.17024	6.64168	0.0363601	0.849054	1.20093	9.62609	13.0227
2004	32.9611	22.2577	1.64256	0.940894	6.00527	3.12999	8.33239	0.0361543	0.555967	1.26812	10.7628	12.1071
2005	32.5189	21.9591	1.65335	0.972284	6.14579	3.19014	8.32644	0.0359772	0.3474	1.27609	10.8304	12.7442
2006	32.0017	21.6098	1.66263	0.983941	6.22585	3.21421	7.98724	0.0363462	0.419248	1.29053	11.1428	13.4256
2007	32.2297	21.7638	1.68668	1.0273	6.44531	3.30889	7.91043	0.042763	0.422208	1.30343	10.4277	13.4318
	-0.907413	-0.907413	0.570428	2.99759	0.465399	2.33096	2.02873	0.434878	-6.70308	1.17537	2.13267	0.954612
Average	33.3181	22.4987	1.65205	0.931286	6.16902	3.10447	7.36432	0.0382324	0.652497	1.2376	10.0685	12.9652
2008	35.7644	24.1507	1.90591	1.17436	7.26424	3.74865	5.60478	0.0420928	0.300127	0.926617	6.68267	12.4354
2009	35.5594	24.0122	1.92496	1.19663	7.23574	3.78625	5.65959	0.0492327	0.245463	0.946056	6.72263	12.6619
2010	35.5037	23.9746	1.94171	1.2291	7.28877	3.87358	5.98484	0.0554449	0.252362	0.931888	7.00364	11.9604
2011	35.1737	23.7518	1.94678	1.24467	7.19331	3.97162	5.99721	0.0430695	0.282883	0.995364	7.16779	12.2318
2012	35.1462	23.7332	1.96752	1.26708	7.14554	4.05412	5.91222	0.0480696	0.295684	1.01451	7.39728	12.0185
2013	34.0697	23.0063	1.92803	1.25226	6.87291	4.08914	7.92505	0.0579309	0.343032	1.00777	7.69771	11.7502
2014	33.9198	22.905	1.95136	1.27154	6.82172	4.18835	8.2637	0.0567681	0.171066	1.08724	7.88581	11.4777
	-0.736839	-0.736839	0.340621	1.18214	-0.87025	1.67565	6.77717	4.98062	-6.14313	2.47633	2.57197	-1.10025
Average	35.0196	23.6477	1.93804	1.23366	7.11746	3.95882	6.4782	0.0503727	0.270088	0.987064	7.22251	12.0765
	-0.0954985	-0.0954985	1.80804	6.49466	1.60811	5.66019	-1.22227	1.4387	-1.65968	-1.0189	-0.0821088	-0.10776
Average 1991-2014	35.1061	23.7061	1.71259	0.929248	6.35573	3.0679	7.31303	0.0454354	0.542969	1.09834	7.95666	12.1658
Table 3 Agricultural input contributions to total CF and relative changing rate(%)
	N	N-N2O	P	K	Pesticides	Plastic film	Raw Coal	Other Washed Coal	Coke	Gasoline	Diesel	Electricity
1991-1999	36.7628	24.8249	1.59106	0.690668	5.92924	2.34246	7.91674	0.047998	0.657852	1.06111	6.65047	11.5247
Rate	1.42745	1.42745	3.6161	8.99969	5.17717	7.37677	-6.82846	-2.00312	8.8821	-6.36425	-4.46738	-0.720171
2000-2007	33.3181	22.4987	1.65205	0.931286	6.16902	3.10447	7.36432	0.0382324	0.652497	1.2376	10.0685	12.9652
Rate	-0.907413	-0.907413	0.570428	2.99759	0.465399	2.33096	2.02873	0.434878	-6.70308	1.17537	2.13267	0.954612
2008-2014	35.0196	23.6477	1.93804	1.23366	7.11746	3.95882	6.4782	0.0503727	0.270088	0.987064	7.22251	12.0765
Rate	-0.736839	-0.736839	0.340621	1.18214	-0.87025	1.67565	6.77717	4.98062	-6.14313	2.47633	2.57197	-1.10025
1991-2014	35.1061	23.7061	1.71259	0.929248	6.35573	3.0679	7.31303	0.0454354	0.542969	1.09834	7.95666	12.1658
Rate	-0.0954985	-0.0954985	1.80804	6.49466	1.60811	5.66019	-1.22227	1.4387	-1.65968	-1.0189	-0.0821088	-0.10776

## Sheet: Figure 1,2
Year/MtCE	Agrochemicals	Agricultural Energy
1991	62.2371	31.053
1992	64.3568	30.333
1993	67.6166	29.0032
1994	71.1101	31.0759
1995	76.7898	33.6969
1996	81.852	35.527
1997	84.0199	23.0082
1998	86.4682	23.2913
1999	86.2724	23.6246
2000	86.0664	37.4781
2001	87.1877	39.2131
2002	88.0825	40.3416
2003	88.8897	40.6434
2004	92.6941	45.7844
2005	94.694	47.8327
2006	97.3214	50.8126
2007	100.402	50.6656
2008	102.225	35.9013
2009	104.464	37.2491
2010	106.829	37.9033
2011	109.23	39.8248
2012	111.182	40.4702
2013	112.03	45.275
2014	112.93	45.9969
					Figure 1. Changes in carbon costs from agrochemical and agricultural energy inputs
Figure 2. Average percentage CO2 emissions caused by different agricultural inputs

## Sheet: Figure 3,4
Yerar Mt/TWh	N fertilizer	P fertilizer	K fertilizer	Pesticides	Plastic film	Electricity	Agricultural output value TCNY	Carbon intensity in production	Carbon intensity in area		Agricultural area (1000 ha)
1991	18.6127	6.34767	3.09067	0.7653	0.642145	47.98	0.815703	0.114368	182.428		511379
1992	19.1023	6.69833	3.50133	0.7992	0.780611	52.24	0.867908	0.109101	184.109		514314
1993	20.1157	7.51567	3.88767	0.8448	0.707321	48.099	0.935605	0.10327	186.444		518223
1994	20.822	8.009	4.35	0.9786	0.887064	53.058	1.01607	0.10057	195.447		522833
1995	22.455	8.56	4.921	1.087	0.915487	58.224	1.12682	0.0980519	211.323		522833
1996	23.9021	9.03293	5.34443	1.1408	1.05615	61.829	1.23274	0.095218	224.489		522872
1997	24.3769	9.5513	5.8798	1.1955	1.16153	45.977	1.31533	0.0813696	204.513		523333
1998	25.0843	9.56823	6.20323	1.2317	1.20687	47.349	1.39425	0.0787228	209.592		523683
1999	24.7428	9.91123	6.58983	1.3216	1.25867	51.035	1.45978	0.0752831	210.075		523133
2000	24.6752	9.96427	6.82457	1.2795	1.33545	67.296	1.51233	0.0816912	236.674		522003
2001	24.9201	10.3363	7.27467	1.2748	1.44929	76.239	1.57585	0.0802111	243.118		519915
2002	25.0409	10.5901	7.69153	1.3113	1.53076	77.623	1.65307	0.0776883	247.668		518533
2003	25.1983	10.838	8.07953	1.3252	1.59167	77.315	1.71919	0.0753453	250.968		516133
2004	26.2322	11.3729	8.68623	1.386	1.67999	80.887	1.84813	0.0749289	268.144		516433
2005	26.6368	11.7823	9.23843	1.4599	1.76233	87.633	1.95348	0.0729606	275.45		517433
2006	27.2445	12.3146	9.717	1.5371	1.84548	94.704	2.05896	0.0719459	288.124		514133
2007	27.982	12.7401	10.3461	1.6228	1.93747	97.896	2.13926	0.0706168	293.582		514568
2008	28.3908	13.1628	10.814	1.6723	2.00692	88.705	2.2612	0.0610852	268.441		514549
2009	28.9611	13.6396	11.3052	1.709	2.0797	93.99	2.36522	0.0599156	275.41		514553
2010	29.5318	14.0514	11.8594	1.7582	2.17299	97.649	2.46928	0.0586131	281.279		514550
2011	30.1312	14.5089	12.3683	1.787	2.29454	101.29	2.5804	0.0577643	289.679		514553
2012	30.6321	14.9189	12.8103	1.80606	2.383	101.257	2.70684	0.0560254	294.725		514553
2013	30.8007	15.1644	13.1325	1.8019	2.49318	102.687	2.81512	0.0558785	305.711		514553
2014	30.9813	15.5061	13.4721	1.80692	2.58	101.339	2.93335	0.0541791
							0.0882353
Figure 2. Change in carbon intensity in agricultural production											Figure 3. Changes in main agricultural inputs
